# Supplementary material
Source: Springer Nature journal article supplement (https://www.springermedizin.de/resource/supplementary/12937_2012_601_MOESM1_ESM.pdf/25653746)
Supplement: MOESM1 [file 25653746]

Potentially relevant references retrieved (n = 115)

References excluded because they did not examine the effect of micronutrient supplements on pregnancy outcomes (n = 51)

Potentially appropriate references identified for review (n = 64)

References excluded (n = 47)

- References based on micronutrient with other macronutrients (n = 28)
- Outcomes of interest not examined (n = 19)

References included in the review (n = 17)

- Calcium and vitamin D (n = 5)
- Iron folic acid supplementation (n = 3)
- Multiple micro nutrient supplementation (n = 9)
